1 Specific miRNA-GPCR networks regulate Sox9a/Sox9b activities

2 to promote gonadal renewal in zebrafish

3 Xinlu Du<sup>1\*</sup>, Huiping Guo<sup>1\*</sup>, Ying Zhang<sup>1</sup>, Jiacheng Wu<sup>1</sup>, Minyou Li<sup>1,3,#</sup>, Xianxian Hua<sup>2,#</sup>, Jizhou Yan<sup>1,3,#</sup>

4 1. Department of Developmental Biology, College of Fisheries and Life Science, Shanghai Ocean University;

5 2. Department of Cancer Biology, University of Pennsylvania School of Medicine

6 3. Key Laboratory of Exploration and Utilization of Aquatic Genetic Resources, Ministry of Education.

7 \* The authors are regarded as joint First Authors

8 # Correspondence to:jyan2@shou.edu.cn, [huax@mail.upenn.edu](mailto:huax@mail.upenn.edu), [myli@shou.edu.cn](mailto:myli@shou.edu.cn)

9 Key words: miRNA network, GPCR, Sox9, gonadal rejuvenation, zebrafish.

10

11 **Running title:** miRNA-GPCR networks and zebrafish gonadal renewal

12 Total characters: 6582, including abstract 169

13

14 **Abstract**

15 Fertility and endocrine function rely on a tightly regulated synchronicity within the hypothalamic-pituitary  
16 gonadal (HPG) axis. FSH/cAMP/MAPK/ Sox9 axis signaling and its regulated specific miRNAs are thought  
17 to regulate vertebrate gonadal development and sex differentiation, and yet the regulatory networks are largely  
18 unknown. Here we construct small RNA and mRNA libraries from sexually matured ovary and testis of  
19 zebrafish to identify specific miRNA-target pairs. Integration of Targetscan prediction and *in vivo* induced  
20 gene expression highlight four specific miRNAs that conditionally target three G protein-coupled receptor  
21 (GPCR) –Sox9 signaling genes, and implicate two regulatory circuits of miR430a-Sox9a in the testis and  
22 miR218a-Sox9b in the ovary. Co-injected Sox9a-miR430a mixture increases the proportion of spermatogonia  
23 but degenerates primary oocyte, while Sox9b-miR218a mixture induces renewal of ovarian follicles.  
24 Co-immunoprecipitation and mass-spectrometry analyses further reveal that miR430a and Sox9a  
25 synergistically activate testicular PKC/Rock1 signals while miR218a and Sox9b constrict ovary  
26 PKC/PI3K/Rock1 signaling. These results clarify specific miRNAs-GPCR regulatory networks of  
27 Sox9a/Sox9b switch, and also provide mechanistic insight into gonadal rejuvenation and plasticity.

28

29 **Introduction**

30 Although cell phenotypic changes often occur in stem cell-based differentiation, dedifferentiation or  
31 transdifferentiation, both stem cells and differentiated cells are able to reversibly dedifferentiate and transform  
32 into cells of different lineages under certain conditions. This phenomenon, called environmentally guided cell  
33 plasticity is the basis of tissue homeostasis, tissue regeneration, cancer cell recover (Galliot & Ghila, 2010),  
34 and sex reversal (Sun, Zhang et al., 2013). One excellent system to study cell plasticity is the vertebrate gonad,  
35 where distinct populations of somatic and germ stem cells give rise to different sex-dependent morphotypes:  
36 male testiculogenesis and female folliculogenesis (Chen, Zheng et al., 2013, Gassei & Schlatt, 2007).  
37 The early gonad is an undifferentiated primordium composed of bipotential somatic stem cells: precursors for  
38 supporting cells and steroid-secreting cells. When the primordial germ cells (PGCs) reside in the gonadal  
39 ridge, the supporting cell precursors develop into either testis-specific Sertoli cells or ovary-specific follicle  
40 (granulosa) cells. Meanwhile the immigrating mesonephric cells give rise to peritubular myoid (PM) cells,  
41 endothelial cells that form the male-specific vasculature, and fetal steroidogenic-Leydig cells (or ovarian theca

42 cells in female) (McClelland, Bowles et al., 2012, Wilhelm, Palmer et al., 2007). In parallel to the  
43 differentiation of somatic precursors, PGCs differentiate into oogonia in ovarian follicles or into  
44 spermatogonia in Sertoli cells-dominant testis cord.  
45 Histologically, testiculogenesis with cord formation and Leyding cell differentiation supports spermatogenesis  
46 while folliculogenesis accompanies ootidogenesis, where the ovarian follicle surrounding the oocyte develops  
47 from a primordial follicle to a preovulatory one. There is a close anatomical relationship between the  
48 development of the genital ridge and the hormone excretory system during early ontogeny of all vertebrates,  
49 including fish. In both teleosts and mammals the testis contains Sertoli and Leydig cells in addition to germ  
50 cells, and the ovary consists of the thecal cells and granulosa cells surrounding the ovum. The gonadal sex  
51 differentiation involves the same sequential cellular events for spermatogenesis and folliculogenesis, in which  
52 ovarian development is the default pathway. Without Sox9-related signaling intervention, the bipotential  
53 gonads follow the ovarian pathway (McClelland et al., 2012, Sun et al., 2013).  
54 An important difference is that the mammalian gonads are terminally developed into either testis or ovary by  
55 Sry-Sox9 genetic intervention, while fish gonads often retain the ability to change, making them sequential  
56 hermaphrodites. Despite the vast diversity of primary sex-determining mechanisms in vertebrate species,  
57 Sox9-related signals appear to be a conserved mechanism to switch on testis-differentiation pathway, where  
58 the expressions of *sox9* and its downstream genes (*amh* and *cyp19a1*) are proposed to be regulated by  
59 gonadotropins and its second messenger cAMP through MAPK signaling pathways (Kobayashi, Chang et al.,  
60 2005, Taieb, Grynberg et al., 2011). Intricately, activation of Sox9-MAPK pathways are also linked to  
61 chondrocyte differentiation (Murakami, Kan et al., 2000). Accumulating evidence implicates versatile  
62 functions of Sox9 in cell fate specification, stem cell biology, human diseases and tissue regeneration (Jo,  
63 Denduluri et al., 2014). Therefore, identifying partner factors, signaling pathways, post-transcriptional  
64 modifications, and integrative signaling pathways could facilitate us to better understand Sox9's versatility in  
65 cell fate switch and adaptive plasticity.  
66 Zebrafish has two co-orthologs of *sox9* on its duplicated chromosomes: *sox9a* and *sox9b*. The pair of *sox9*  
67 genes show distinct and overlapping functions in zebrafish embryonic development (Rodriguez-Mari, Yan et  
68 al., 2005, Yan, Willoughby et al., 2005). In the adults, *sox9a* is expressed in many tissues including testis,  
69 whereas *sox9b* expression is restricted to previtellogenic oocytes of the ovary (Chiang, Pai et al., 2001).

70 Correspondingly two Sox9 downstream genes, *amh* and *cyp19a1a*, are also respectively expressed in the  
71 juvenile testis and ovary (Rodriguez-Mari et al., 2005). Therefore, zebrafish bipotential gonad is a unique  
72 system to explore more informative *sox9* axis signaling pathways controlling gonadal sexual fate.  
73 MicroRNAs (miRNAs) represent a second regulatory network that regulates gene expression in various  
74 biological processes by inducing degradation or translational inhibition of their target mRNAs (Tao, Sun et al.,  
75 2016). Based on miRNA expression in the gonads at the time of sexual differentiation, a number of miRNAs  
76 and the potential targets are identified. Some specific miRNAs show regulatory activities in gonad  
77 development and/or sex determination (Kang, Cui et al., 2013, Xiao, Zhong et al., 2014). Even though  
78 miR-124 was reported to be sufficient to induce the repression of both SOX9 translation and transcription in  
79 ovarian cells (Real, Sekido et al., 2013), no the specific miRNA-*sox9* axis regulatory networks have been  
80 identified so far (Tao et al., 2016). In this study we performed genome-wide search for specific miRNA-target  
81 pairs, and investigated physiological interaction effects between specific miRNAs and the target genes.  
82 Particularly, we focused on specific miRNA- Sox9a/Sox9b networks in regulation of testiculogenesis and  
83 folliculogenesis.

84

## 85 **Results**

### 86 **Identification of genes related to sex-specific fate during the process of gonadal differentiation** 87 **maturation**

88 To identify genes functioning in folliculogenesis and testiculogenesis, we dissected the freshly matured  
89 gonads at 5mpf (months post-fertilization), and separated the ovary and testis for RNA deep sequencing  
90 analyses. Out of 26,459 genes (Table S1), 25,609 genes were expressed in either or both sex gonads. 18,993  
91 genes exhibited 2 fold or more expression changes (Table S2), and 729 genes were significantly differentially  
92 expressed in testis or ovary ( $P < 0.05$ ) (Table S3), including 421 ovary-, and 308 testis-highly expressed (Table  
93 S4). As the predominant expression of these induced genes synchronized with the reproductive growth cycle  
94 (testicular or follicle differentiation), we categorized 729 biased genes as sex-preferential effectors and/or  
95 regulators.

96 Our initial goal was to clarify the proposed gonadotropins-cAMP-MAPK- Sox9 signaling pathways during  
97 sex gonadal differentiation, Gonadotropins including follicle-stimulating hormone (FSH) and luteinizing

98 hormone (LH), are glycoprotein peptide hormones. Gonadotropin receptors are coupled to  
99 the G-protein system. We searched the two transcriptome datasets for GPCR-*sox9* axis genes. These included  
100 92 GPCR, 35 cAMP, 34 MAPKs, and 21 p53 orthologs as well as 30 sex determinant genes. The vast  
101 majority of the GPCR-*sox9* axis genes (201/212) did not show significant differential expression between  
102 testis and ovary (Table S5). This result conformed to the phenomena that miRNAs only modestly  
103 downregulate the mRNA level of their target genes (Selbach, Schwanhausser et al., 2008).

#### 104 **Identification of specific miRNAs and GPCR-*sox9* axis target genes for gonadal differentiation**

105 To identify specific miRNAs-target pairs in reproductive cycle, we analyzed two small RNA libraries, which  
106 were simultaneously constructed from the same ovary or testis total RNA samples as the mRNA libraries were  
107 made. After aligning the small RNA sequences with the miRBase (zebrafish miRNA database), bioinformatic  
108 analysis identified 350 unique mature miRNAs, and 346 miRNA precursors. 314 miRNAs were found in  
109 either of the two libraries, of which 51 miRNAs showed 2-fold higher transcription in testis (refer to testis  
110 miRNAs) and 106 miRNAs were preferentially transcribed in ovary (ovary miRNAs).

111 Using TargetScan to search for the target pairs between 157 sex-biased miRNAs and 209 GPCR-*sox9* axis  
112 genes, we found that 97 miRNAs targeted 183 GPCR-*Sox9* axis genes, including those multiple and cross  
113 targets (Table S7). For example *sox9a* was targeted by 25 miRNAs and *sox9b* was targeted by 20 miRNAs.

#### 114 **Four specific miRNAs represent putative regulators in GPCR-*sox9*-axis**

115 To derive a short-list of specific miRNAs as putative regulators in GPCR-*sox9* axis, we selected the  
116 representative miRNAs-target pairs according to the criteria in Table 1. Combined with the expression pattern  
117 of endogenous pre-miRNAs (Fig.S1), four potentially interesting miRNAs were accordingly selected as the  
118 most overrepresented miRNAs: miR430a (multiple splicing isoforms and 17 multiple targets in GPCR-*sox9*  
119 axis of signaling cascades, not directly targeting *sox9*), miR218a (50 targets, not directly targeting *sox9* but  
120 targeting *vasa*), miR734 (95 targets, directly targeting *sox9a*), and miR141 (72 targets, directly targeting *sox9b*)  
121 (Table S7).

122 Table 1 A short list of overrepresented miRNAs

| Criteria# | Ovary | Testis |
|-----------|-------|--------|
|-----------|-------|--------|

|                                                                                                                         |                                                                                                                                                                                                                                                                                         |                                                                                                      |
|-------------------------------------------------------------------------------------------------------------------------|-----------------------------------------------------------------------------------------------------------------------------------------------------------------------------------------------------------------------------------------------------------------------------------------|------------------------------------------------------------------------------------------------------|
| Highly and differentially transcribed (expression abundance $\geq 100$ , log <sub>2</sub> ratio $\geq 1.5$ )            | miR-23b, -724, -181a-5p, -135c, -200c-3p, -218b, R-218a, -200a-3p, -21, -455-5p, -144-3p, -455-2-5p, -194a, -146a, -181c-5p, -200a-5p, -181b-5p, -216a, -429a, -200b-3p, -34a, -223, -122, -184, -192, -181a-2-3p, -let-7i, -34c-5p, -34b, -146b, -34c-3p, -430b-5p, -430b-3p, -430a-3p | miR-723-3p, -2187-5p, -735-3p, -2189, -499-5p, -132-3p, -193b-3p, -7a, -458-3p, -7b                  |
| Capable of targeting multiple genes (target genes $\geq 25$ for ovary miRNAs; target genes $\geq 14$ for testis miRNAs) | miR-218a, -737, -734, -724, -181a, -144, -200b, -129, -139, -455, -459, -27a, -223, -216a, -122, -194a, -181a, -216b, -2192, -192, -205, -17a, -34b                                                                                                                                     | miR-203a, -128, -9, -182, -2187, -2189, -499, -723, -124, -219, -134, -203a, -128, -124, -499, -2189 |
| Commonly prominent in both gonads                                                                                       | miR-141, -363, -23a                                                                                                                                                                                                                                                                     | miR-141, -363, -23a                                                                                  |
| Non target*                                                                                                             | miR-301c, -301b                                                                                                                                                                                                                                                                         | miR-301c, -301b                                                                                      |

123 #, 1) miR-430a has multiple versions, such as miR-430a-3p, 5p; -4-5p; 11-17-5p, etc. Different versions of  
124 miRNAs are indistinguishable in Targetscan. 2) The *vasa* gene is targeted by miR218a. *vasa* expression is  
125 seen in germ cells, specifically the germline stem cells (GSC's) of female ovaries and in the early stages of  
126 spermatogenesis in the male testis. 3) The miR-430/427/302 family is crucial for vertebrate embryogenesis by  
127 controlling germ layer specification (Rosa, Spagnoli et al., 2009).

128 \*, non-target miRNAs as negative control.

### 129 Interaction modes between specific miRNAs and GPCR-*sox9* targets in testis and ovary

130 To investigate the physiological interactions between four specific miRNAs and GPCR-*sox9* axis targets, we  
131 devised an *in vitro* gonadal microinjection strategy to enforce exogenous expression of Sox9a/Sox9b and four  
132 specific miRNAs in the gonads, and evaluated their effects on the expression of GPCR-*sox9* axis targets  
133 (Table S8). When the Targetscan prediction and RT-PCR examinations were integrated together, four  
134 interaction modes emerged (Table 2) : 1) a negative specific miRNA-target pair: a predicted target was  
135 downregulated in both gonads by a specific miRNA; 2) a positive specific miRNA-target pair: a predicted  
136 target was upregulated in both gonads by a specific miRNA; 3) a conditionally specific miRNA-target pair: a  
137 predicted target was upregulated by a specific miRNA in one sex gonad but downregulated in the other gonad;  
138 and 4) an indirect specific miRNA-target: a gene without specific miRNA binding sites was downregulated or  
139 upregulated. Totally 92.3% (12 of 13) of predicted targets of GPCR-*sox9* genes were correctly scored as direct  
140 targets in testis and/or ovary by at least one of four specific miRNAs. Fig.1 showed crossing alignment

141 between four specific miRNAs and 15 putative target genes.

142 Table 2 Interactions between specific miRNAs and GPCR-Sox9 axis\*

| Over-expression              | <i>gpr157</i>                | <i>gpr173</i>                 | <i>grk1a</i>                   | <i>grk7a</i>      | <i>lgr4</i>                   | <i>grk5l</i>                 | <i>gpr161</i>                | <i>grk4</i>                   | <i>gpr146</i>                | <i>gpr137c</i>               | <i>grk6</i>                   | <i>amh</i>                     | <i>sox9a</i>                 | <i>sox9b</i>                    | <i>cyp19a1a</i> |
|------------------------------|------------------------------|-------------------------------|--------------------------------|-------------------|-------------------------------|------------------------------|------------------------------|-------------------------------|------------------------------|------------------------------|-------------------------------|--------------------------------|------------------------------|---------------------------------|-----------------|
| <b>Testis microinjection</b> |                              |                               |                                |                   |                               |                              |                              |                               |                              |                              |                               |                                |                              |                                 |                 |
| sox9a                        | 29.10<br>±5.8                | 62.49<br>±3.99                | 36.40±8.9                      | 1612.38<br>±412.3 | 12.81<br>±0.63                | 8.51<br>±0.94                | 103.96<br>±13.01             | -2.73<br>±0.69                | 77.45<br>±3.99               | 36.86<br>±8.4                | 23.05<br>±3.2                 | 3.10<br>±1.1                   | 9042.18<br>±2068.0           | -11.52<br>±8.4                  | -1.78<br>±0.1   |
| sox9b                        | 1.27<br>±0.41                | -1.46<br>±0.29                | 5.02<br>±0.74                  | 208.28<br>±36.60  | -7.64<br>±1.85                | 11.91<br>±6.98               | 22.82<br>±9.8                | 18.54<br>±5.2                 | 2.07<br>±0.25                | 5.00<br>±0.19                | 3.27<br>±0.9                  | 2.24<br>±0.43                  | 135.88±<br>20.28             | 1095.05<br>±62.07               | 9.73<br>±2.33   |
| miR-430a-3p                  | -1.18<br>±0.26               | <b>1.55</b><br><b>±0.04</b>   | <b>1.56</b><br><b>±0.29</b>    | -2.03<br>±0.27    | <b>-5.10</b><br><b>±0.26</b>  | <b>-4.87</b><br><b>±0.27</b> | 2.37<br>±0.10                | <b>-11.51</b><br><b>±4.60</b> | <b>1.06</b><br><b>±0.10</b>  | 1.31<br>±0.06                | -2.14<br>±0.27                | -1.49<br>±0.12                 | 35.10<br>±2.1                | -72.18<br>±18.4                 | -79.74<br>±4.6  |
| miR-218a                     | <b>-1.30</b><br><b>±0.04</b> | 1.11<br>±0.11                 | -1.66<br>±0.01                 | 22.24<br>±0.33    | 1.02<br>±0.03                 | <b>-1.38</b><br><b>±0.14</b> | 1.53<br>±0.28                | <b>-1.10</b><br><b>±0.23</b>  | -1.64<br>±0.80               | -1.24<br>±0.03               | -1.31<br>±0.15                | -1.50<br>±0.19                 | -3.78<br>±0.80               | 1.09<br>±0.12                   | -2.17<br>±0.16  |
| miR-141-3p                   | <b>-2.21</b><br><b>±0.09</b> | <b>-4.15</b><br><b>±0.26</b>  | -3.20<br>±0.42                 | ND                | <b>-4.34</b><br><b>±0.32</b>  | 1.37<br>±0.04                | <b>-2.84</b><br><b>±0.47</b> | <b>15.91</b><br><b>±2.85</b>  | -2.90<br>±0.03               | <b>-2.68</b><br><b>±0.12</b> | <b>-3.27</b><br><b>±0.30</b>  | 91.76<br>±11.07                | 14.08<br>±1.42               | <b>-457.87</b><br><b>±41.48</b> | -1.68<br>±0.01  |
| miR-734                      | <b>-1.24</b><br><b>±0.02</b> | <b>-3.38</b><br><b>±0.34</b>  | <b>-1.15</b><br><b>±0.02</b>   | ND                | <b>-3.23</b><br><b>±0.26</b>  | <b>-1.84</b><br><b>±0.21</b> | <b>-1.62</b><br><b>±0.16</b> | <b>19.28</b><br><b>±4.23</b>  | -3.75<br>±0.17               | -2.90<br>±0.33               | <b>-2.59</b><br><b>±0.12</b>  | <b>117.69</b><br><b>±21.36</b> | <b>-6.47</b><br><b>±0.55</b> | -166804<br>±5099.0              | 2.80<br>±0.28   |
| <b>Ovary microinjection</b>  |                              |                               |                                |                   |                               |                              |                              |                               |                              |                              |                               |                                |                              |                                 |                 |
| sox9a                        | 3.80<br>±0.17                | 1.86<br>±0.78                 | 3.05<br>±0.29                  | 6.01<br>±0.47     | 1.26<br>±0.01                 | 2.26<br>±0.22                | 8.46<br>±1.91                | 2.98<br>±0.03                 | 7.64<br>±2.21                | 18.79<br>±3.42               | 2.96<br>±0.32                 | 10.26<br>±0.77                 | 954.24<br>±622.2             | 5.02<br>±0.21                   | 1.29<br>±0.18   |
| sox9b                        | 14.61<br>±7.37               | 28.32<br>±3.20                | 26.77<br>±5.26                 | 54.88<br>±4.76    | 10.02<br>±1.52                | 16.63<br>±6.86               | 169.36<br>±29.59             | 5.52<br>±0.12                 | 45.68<br>±4.42               | 74.58<br>±34.84              | 27.50<br>±2.41                | 7.25<br>±3.57                  | 984.32<br>±40.25             | 1506.45<br>±450.2               | 9.46<br>±5.64   |
| miR-430a-3p                  | -7.50<br>±0.42               | <b>-7.10</b><br><b>±0.14</b>  | <b>-9.22</b><br><b>±1.73</b>   | -37.29<br>±3.35   | <b>-7.34</b><br><b>±0.25</b>  | <b>-8.32</b><br><b>±0.32</b> | -8.53<br>±0.55               | <b>-13.60</b><br><b>±1.22</b> | <b>-7.25</b><br><b>±1.21</b> | -4.44<br>±0.19               | -6.41<br>±0.12                | 3.82<br>±0.44                  | -9.10<br>±2.32               | -2.19<br>±0.13                  | -9.59<br>±0.35  |
| miR-218a                     | <b>-9.13</b><br><b>±0.76</b> | -1.29<br>±0.26                | -3.00<br>±0.72                 | 2.61<br>±0.20     | -1.28<br>±0.15                | <b>-5.41</b><br><b>±0.05</b> | -4.07<br>±1.24               | <b>-8.90</b><br><b>±1.01</b>  | -1.30<br>±0.61               | -3.34<br>±0.09               | -2.09<br>±0.16                | 1.25<br>±0.09                  | -1.87<br>±0.10               | 1.19<br>±0.06                   | -5.46<br>±0.42  |
| miR-141-3p                   | <b>-6.62</b><br><b>±0.68</b> | <b>-35.00</b><br><b>±6.40</b> | -24.51<br>±6.21                | ND                | <b>-35.95</b><br><b>±2.32</b> | -1.37<br>±0.04               | <b>-6.83</b><br><b>±0.40</b> | <b>-4.97</b><br><b>±0.91</b>  | -12.32<br>±0.01              | <b>-1.59</b><br><b>±0.15</b> | <b>-15.20</b><br><b>±2.14</b> | 1.74<br>±0.31                  | 5.47<br>±1.35                | <b>-82.96</b><br><b>±25.89</b>  | 2.45<br>±0.16   |
| miR-734                      | <b>3.64</b><br><b>±0.17</b>  | <b>-5.20</b><br><b>±1.41</b>  | <b>-160.54</b><br><b>±3.11</b> | ND                | <b>-5.23</b><br><b>±0.50</b>  | <b>8.07</b><br><b>±0.06</b>  | <b>1.09</b><br><b>±0.06</b>  | <b>1.18</b><br><b>±0.18</b>   | -2.99<br>±0.11               | -1.02<br>±0.07               | <b>-1.98</b><br><b>±0.36</b>  | <b>7.12</b><br><b>±1.46</b>    | <b>19.15</b><br><b>±3.12</b> | -9.35<br>±2.91                  | 1.56<br>±0.17   |

143

144 \*, 27 Predicted targets in bold; 17 negative specific miRNA-target pairs in bold and underlined; 2 positive

145 specific miRNA-target pairs in bold and italicized; 8 conditional specific miRNA-target pairs and one

146 undetected (ND) in bold only. The remaining is indirect specific miRNA-targets.

147

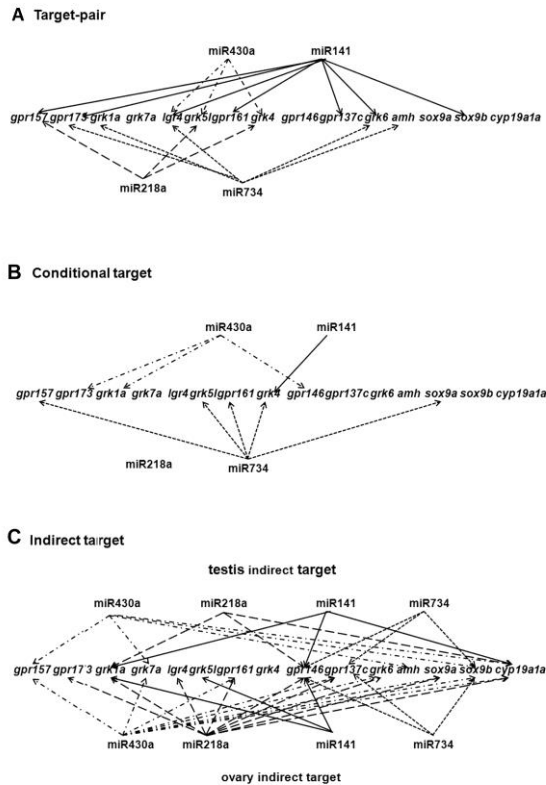

148

149 **Fig.1. Interaction modes between four specific miRNAs and GPCR-Sox9a/b targets**

150

151 **Specific miRNAs-GPCR network regulate Sox9a/Sox9b signaling at post-transcription and protein level**

152 Previous study has identified several *sox9* downstream genes (*cyp19a*, *cyp19b*, *amh*) as potential targets of

153 miR430 family during sexual transformation of the rice field eel (Gao, Guo et al., 2014). Here we found that

154 miR734 and miR141 formed target-pairs or conditional target pairs with *sox9a*, *amh* and/or *sox9b*, while

155 miR430a and miR218a only showed indirect interactions with these genes and *cyp19a1a* (Fig.1). Referred to

156 *sox9a* and *sox9b* transcription, increased miR141 and miR734 showed similar regulatory functions as

157 miR430a (Table S8). Additionally three miR430a direct target genes (*lgr4*, *grk5l*, *grk4*) were also pair-targets

158 or conditional pair-targets for miR141, miR734 and miR218a (Fig.1). Thus, the four miRNAs may coordinate

159 to regulate Sox9a/Sox9b activity through GPCR-signaling networks.

160 We then investigated the regulatory modes between the four specific miRNAs and two Sox9 isoforms.

161 Sustained Sox9b expression increased the transcription of four pre-miRNAs in both ovary and testis, whereas

162 enforced Sox9a only induced pre-miR430a transcription in testis (Fig.S2). Similarly, overexpressed Sox9a and

163 Sox9b activated all tested GPCR-*sox9* genes in the ovary whereas a few genes were suppressed in testis.



164 When mature miR430a oligos were injected into the testis, *sox9a* transcript was increased but *sox9b* transcript  
165 was strongly reduced. In the ovary, elevated miR430a somewhat reduced transcripts of *sox9a*, *sox9b* and  
166 *cyp19a1a*. In contrast to miR430a-Sox9a reciprocal activation in the testis, miR218a downregulated  
167 transcripts of *sox9a* and *cyp19a1a* but modestly upregulated *sox9b* transcript in both testis and ovary.  
168 These results implicated two transcriptional regulatory circuits: miR430a-Sox9a, and miR218a-Sox9b.  
169 Relative to miR218a-Sox9b's extensive and ovary-biased regulation, miR430a-Sox9a synergic regulation  
170 was specific in the testis. When we constructed a GFP reporter for 3'UTR of *sox9a* and *sox9b*, and carried out  
171 GFP reporter assays in zebrafish embryonic fibroblast cells (Pac2), we found that miR430a and miR218a not  
172 only regulates the two Sox9 genes' transcription, but also confines the two proteins' subcellular distribution  
173 (Fig.S4, S5).

#### 174 **Gonadal microinjection of specific miRNAs-Sox9 mixture cause renewal of gonocytes**

175 To evaluate two miRNA-Sox9 regulatory circuits and its role in the gonadal differentiation, we conducted a  
176 combinatory microinjection into mature gonads (5mpf), and then compared cellular events of somatic cells  
177 and germline cells (Fig.2A, 2B). Enforced Sox9a-miR430a mixture expression increased the proportion of  
178 mitotic condensed chromatin nuclear cell (Cn) and undifferentiated gonocytes (Gc), and increased  
179 degeneration of primary oocytes (Fig.2Aa, d). Co-injected Sox9a- miR141-miR734 cocktails increased  
180 proportion of spermatocytes (Sc), and also induced ovary-testis transition (indicated by oocyte degeneration  
181 and multinucleate cell generation, Fig.2Ab, 2Ae). Conversely, enforced Sox9b- miR218a expression increased  
182 each stage of follicles (oocytogenesis), but reduced testis Cn and Sc with increase of deforming Gc (Fig. 2Ac,  
183 2Af). We didn't found consistent roles of other Sox9a/ Sox9b-miRNAs mixtures in testiculogenesis and  
184 folliculogenesis (Fig.2C, Fig.S3).

185 Since Sox9a, Sox9b and pre-miRNAs transcripts were differentially transcribed in the testis and ovary  
186 (Fig.S1), and naturally reduced with age, we posited that exogenous specific miRNAs-coupled Sox9a or  
187 Sox9b may induce certain "rejuvenation" effects on the old gonads. To explore this possibility, we tested  
188 1.5-2 years old of zebrafish. As expected, Sox9a-miR430a mixture significantly increased the proportion of  
189 Gc and Cn whereas Sox9b-miR218a mixture increased all stages of follicles. Sox9b+miR430a increased the  
190 testis Cn and Sc (Fig.2Bc, 2Cc) as well as the primordial follicles (Fig.2Be). Compared to the injection into

191 the young fish (5 months olds) (Fig.2A), Sox9b-miR218a mixture (Fig.2A-2B) more significantly increased  
192 the ratio of the primordial follicles in the old fish.

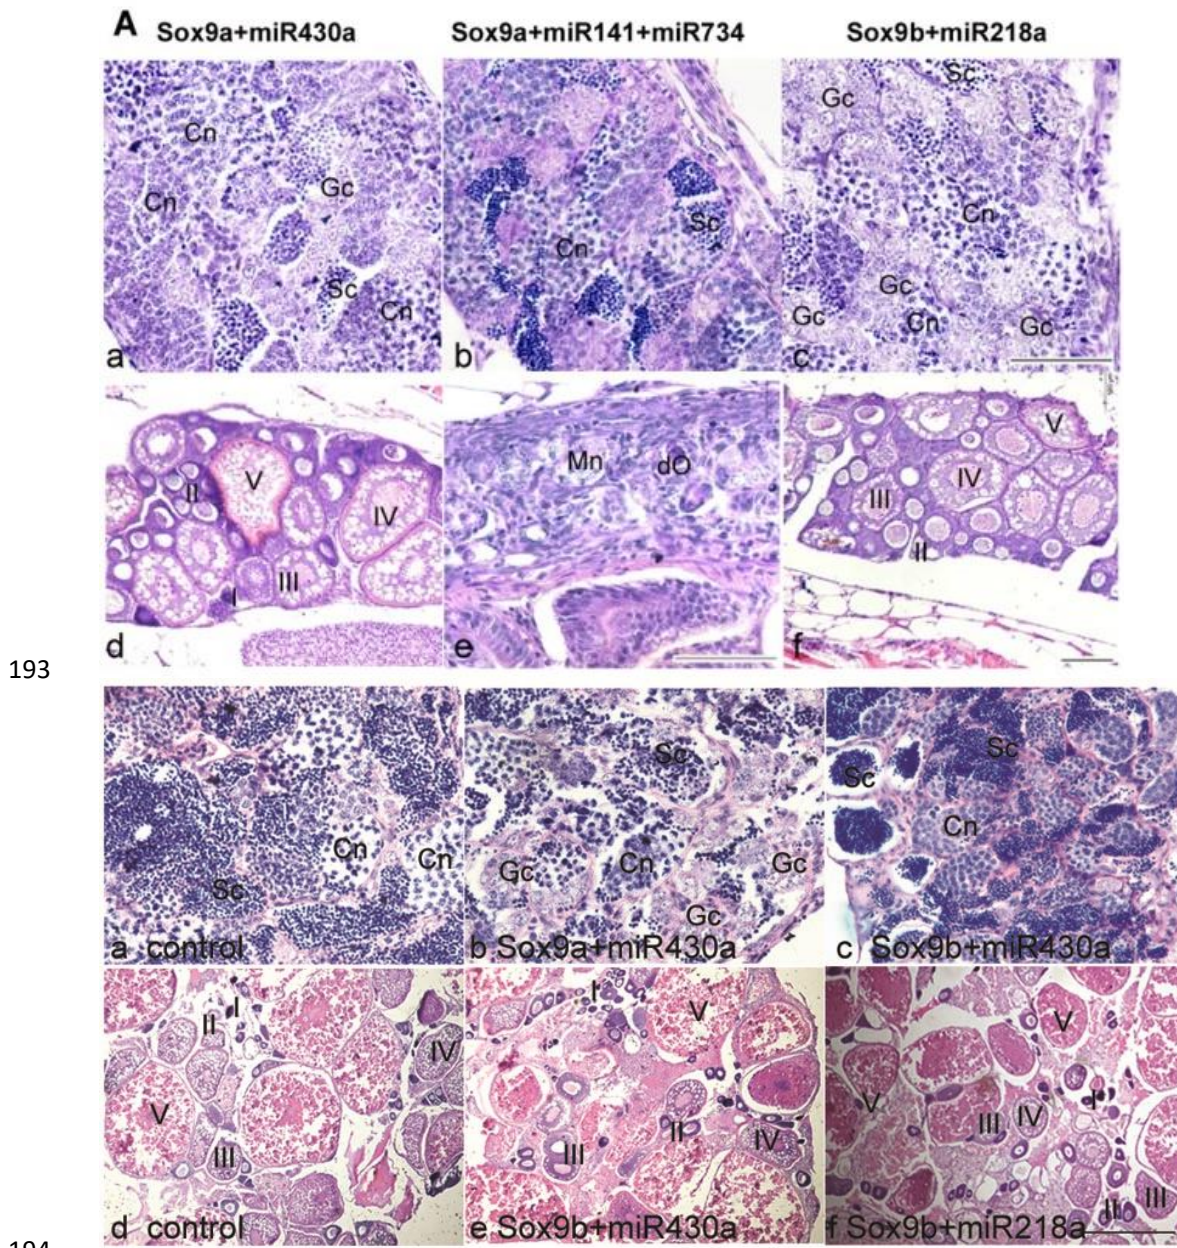

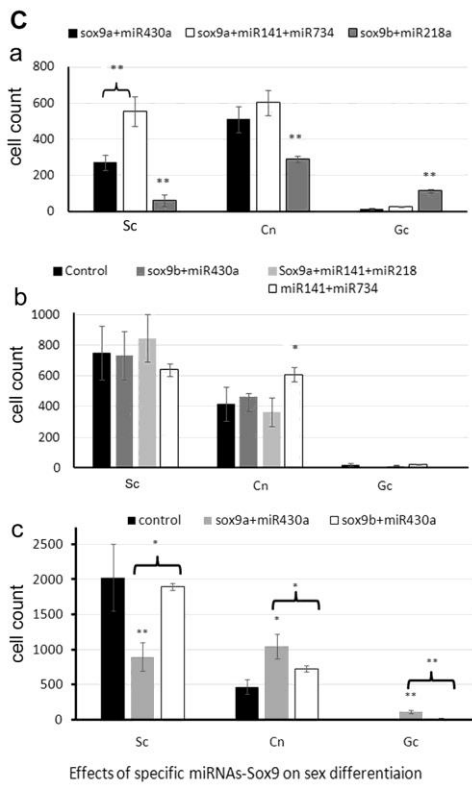

195

Effects of specific miRNAs-Sox9 on sex differentiation

196 **Fig.2. Effects of exogenous Sox9a/Sox9b coupled specific miRNAs on testiculogenesis and**  
 197 **folliculogenesis.** (A) Histological observations on testiculogenesis and folliculogenesis in mature zebrafish (5  
 198 mpf). Based on cell morphology, the germline cells were classified into three categories: gonocytes (Gc),  
 199 mitotic condensed chromatin nuclear cell (Cn), and mature sex gamete (Gm). Gc includes spermatogonia,  
 200 oogonia or other undifferentiated PGCs. (Cn) includes spermatocytes, or primary oocytes (pOc), Gamete  
 201 includes spermatids or spermocyte (Sc), secondary oocyte within five stages of follicles (I-V). Degenerating  
 202 oocytes (dO) were indicated by arrow. Some enlarged gonocytes (indicated by arrow head) looked like early  
 203 perinucleolar oocytes (or regarded as deforming gonocytes). (B) Histological observations on testiculogenesis  
 204 and folliculogenesis in old fish (1.5 years old). a-c show testiculogenesis; d-f show various stages of  
 205 follicluogenesis: stage Ia, Ib, II, III, and IV oocytes. (C) Statistical analyses on cell count of germ cells at  
 206 various stages of spermatogenesis and oogenesis. The proportion of each category was compared among  
 207 different specific miRNA-Sox9a/b treatments for 5mf fish (a, b) and 1-1.5 years old fish (c). \* ( $p < 0.05$ ), \*\*  
 208 ( $p < 0.01$ ). Scale bar = 50  $\mu\text{m}$  (testis) and 500  $\mu\text{m}$  (ovary).

209

210 To further test the rejuvenation effects, we performed the same specific miRNA-Sox9a/b microinjection into

211 the old gonads of *vasa* promoter-driven GFP transgenic medaka. Germ cell-specific gene, *vasa*, is most  
212 abundantly expressed in mitotic germ cells (oogonia and spermatogonia) and reduced in meiotic germ cells  
213 (Tanaka, Kinoshita et al., 2001, Yuan, Li et al., 2014). As shown in Fig.S3B, miR430a-Sox9a increased the  
214 testis GFP-positive cells; miR430a-Sox9b increased the ovarian primordial follicles; and miR218-Sox9b  
215 increased all stages of follicles (mostly of primordial follicles). These results reaffirmed that miR430a-Sox9a  
216 coordination is sufficient to induce spermatogenesis while miR218a-Sox9b could promote renewal of ovarian  
217 follicles.

### 218 **MiR430a and miR218a conversely regulate chemical modifications of Sox9a/Sox9b proteins**

219 Since *grk4* and *grk5l* encode the members of G protein-coupled receptor kinase subfamily, our proposed  
220 specific miRNA-GPCR networks may regulate Sox9a and Sox9b protein modifications. Presumably covalent  
221 modifications in Sox9a and Sox9b proteins would change the molecular-weight sizes and/or band patterns.  
222 Immunoblotting analyses showed that specific Sox9a and Sox9b antibodies recognized several bands, which  
223 molecular-weight sizes were bigger than the predicted; and the band patterns were changed after  
224 cotransfections of miR430a or miR218a (Fig.3A). In the transfected Pac2 cells, the presumed protein  
225 modifications (Fig.3.B) were not significant as those occurred in the microinjected gonadal tissues.

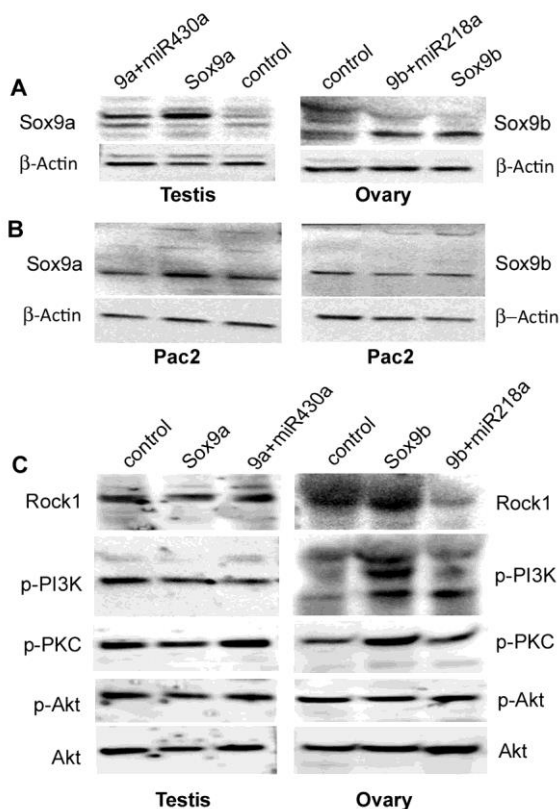

226

227 **Fig.3. Immunoblotting analyses of endogenous and exogenous Sox9a/Sox9b protein modifications.** (A)  
228 The testes were microinjected with pSox9a-myc (Sox9a) or pSox9a-myc and miR430a mix (9a+miR430a);  
229 the ovaries were injected with pSox9b-myc (Sox9b) or pSox9b-myc and miR218a mix (9b+miR218a). (B). In  
230 the *in vitro* cultured Pac2 cells were transfected with pSox9a-myc, pSox9a-myc/miR430a mix, pSox9b-myc,  
231 pSox9b-myc/miR218a mix, or empty-control. (C). Sex gonads were microinjected as described in (A). The  
232 expression of each signaling component was examined. Relative signal intensity was calculated compared to  
233 total Akt.

234  
235 Co-immunoprecipitation (Co-IP) coupled-mass spectrometer analysis indicated several reverse changes in  
236 covalent modifications (Table 3). First, enforced Sox9a-injected gonadal tissues showed enriched Sox9a  
237 peptide phosphorylation, acetylation and ubiquitination. On co-injection with miR430a, Sox9a  
238 phosphorylations and ubiquitination decreased, but oxidation increased. Meanwhile phosphorylation,  
239 ubiquitination and carbamidomethyl at Sox9b and Sox8b peptides were increased by enforced  
240 miR430a-Sox9a mixture. Second, enforced Sox9b induced extensive Sox9b acetylation while addition of  
241 miR218a retained Sox9b acetylation, but increased oxidation and phosphorylation at Sox9b, Sox9a and Sox8a  
242 peptides. Third, both Sox9a and Sox9b peptides were highly acetylated, and mostly accompanied with other  
243 modifications. Statistical analysis indicated that the putative enzymes responsible for significantly enriched  
244 phosphorylations, and acetylation, included phosphatidylinositol 3-kinase, rho-associated protein kinase,  
245 mitogen-activated protein kinase-activated protein kinase 2a, protein kinase C, novel protein similar to  
246 vertebrate carnitine acetyltransferase (CRAT), n-alpha-acetyltransferase 35, and acetyl-CoA acetyltransferase.  
247 We then verified whether the identified kinases linked to our proposed miR430a/miR218a-GPCR-Sox9  
248 networks. Enforced Sox9b increased Rock1, p-PI3K and p-PKC in the ovary while co-injected miR218a  
249 suppressed Rock1 and p-PKC, partially suppressed p-PI3K, and increased p-Akt, suggesting that miR218  
250 could modulate Sox9b activations (Fig.3C). In the testis, Sox9a did not activate Rock1, p-PI3K and p-PKC;  
251 However, Sox9a and miR430a mixture activated p-PKC and Rock1 signaling.

252

253 Table 3 CoIP-Mass spectrometer analyses on chemical modifications in Sox9a and Sox9b peptides

| Enforced | Sequence | Matched | Modifications * | Putative enzymes |
|----------|----------|---------|-----------------|------------------|
|----------|----------|---------|-----------------|------------------|

| expression#       |                                | protein                         |                                                          |                                                                                                                                                                                              |
|-------------------|--------------------------------|---------------------------------|----------------------------------------------------------|----------------------------------------------------------------------------------------------------------------------------------------------------------------------------------------------|
| Sox9a             | NGQSESEDGSEQTHI<br>SPNAIFK     | Sox9a                           | 3xPhospho [S4; S6;<br>S10]; 1xAcetyl [K22]               | Phosphatidylinositol<br>3-kinase, Rho-associated<br>protein kinase,<br>Serine/threonine-protein<br>kinase SBK1 ,<br>Tyrosine-protein kinase<br>BAZ1B (Fragment)                              |
|                   | TLGKLWRLLENEVK                 | Sox9a                           | 1xAcetyl [T/K];<br>1xPhospho [T1]; 1xGG<br>[K14]         |                                                                                                                                                                                              |
| Sox9a+<br>miR430a | NKPHVKRPMNAFM<br>VWAQAARR      | Sox9a                           | Acetyl [N];<br>1xOxidation [M9]                          | Novel protein similar to<br>vertebrate carnitine<br>acetyltransferase<br>(CRAT) ;<br>N-alpha-acetyltransferase<br>35,<br>Mitogen-activated<br>protein kinase-activated<br>protein kinase 2a. |
|                   | ADLKR                          | Sox9a,Sox9b,                    | 1xAcetyl [N-Term]                                        |                                                                                                                                                                                              |
|                   | TDLPVCSKADLKR                  | Sox9b                           | 1xPhospho [T1];<br>1xAcetyl [T/K]                        |                                                                                                                                                                                              |
|                   | VSGSGKSKPHVK                   | Sox9b,Sox8b                     | 1xPhospho [S7];<br>1xAcetyl [N-Term];<br>2xGG [K6; K8]   |                                                                                                                                                                                              |
| Sox9b             | VSGSGKSKPHVK                   | Sox9b                           | 1xAcetyl [K6]                                            | Acetyl-CoA<br>acetyltransferase                                                                                                                                                              |
|                   | LRVQHKK                        | Sox9b                           | 2xAcetyl[K6; K7]                                         |                                                                                                                                                                                              |
|                   | DAVSQVLK                       | Sox9b                           |                                                          |                                                                                                                                                                                              |
| Sox9b+<br>miR218a | RPMNAFMVWAQAA<br>RRK           | Sox9a,<br>Sox9b,Sox10,<br>Sox8a | 2xOxidation [M3; M7]                                     | Acetyl-CoA<br>acetyltransferase,<br>Protein kinase C.                                                                                                                                        |
|                   | DAVSQVLK                       | Sox8a,Sox9b                     |                                                          |                                                                                                                                                                                              |
|                   | VSGSGKSKPHVKRP<br>MNAFMVWAQAAR | Sox9b, Sox8,<br>Sox9a           | Acetyl [K]; 1xPhospho<br>[S7]; 2xOxidation<br>[M15; M19] |                                                                                                                                                                                              |
|                   | ADLKRER                        | Sox9b                           | 1xAcetyl [K4]                                            |                                                                                                                                                                                              |
|                   | VNGSSKNKPHVKRP<br>MNAFMVWAQAAR | Sox9a                           | Acetyl [K];<br>1xOxidation [M19]                         |                                                                                                                                                                                              |

254

255 #, Sex gonads from 20 Fish (2 months post fertilization, uncertain male or female) were divided four groups  
256 and separately injected by 1) Sox9a-Myc plasmid; 2) Sox9a-Myc plasmid+miR430a+miR141; 3)Sox9b-Myc  
257 plasmid; and 4) Sox9b-Myc plasmid+miR218a. Two more injections were repeated in the first week. Two  
258 weeks later, the gonads were collected for co-immunoprecipitation with Sox9a-Myc antibody mix (group 1

259 and group2) or Sox9b-Myc antibody mix (group3 and 4).

260 \*,3xPhospho [S4; S6; S10], three phosphorylations at 4<sup>th</sup>, 6<sup>th</sup>, 10<sup>th</sup> serine residues of the peptide; 1xAcetyl  
261 [K22], one acetylation at 22<sup>nd</sup> lysine residue of the peptide; 1xGG [K14], one ubiquitination at 14<sup>th</sup> lysine  
262 residue of glyglylys peptide; 1xOxidation [M9], one oxidation at 9<sup>th</sup> methaline residue of the peptide.

263

264 Although specific antibodies are required to verify the exact modifications in Sox9a and Sox9b proteins,  
265 together with the results shown in Fig.3, Fig.S2, Table2 and Table 3, we can make following conclusions: 1)  
266 Sox9b up-regulated GPCR genes (*lgr4*, *grk5l*, *grk4*), and extensively activate PKC/PI3K/Rock1 signaling  
267 pathways and Sox9a/b modifications while miR218a could restrain such activations possibly by  
268 phosphorylation of Sox9b through PI3K-pAkt pathway. 2) In the testis, miR430a and Sox9a reciprocally  
269 regulate GPCR genes (*lgr4*, *grk5l*, *grk4*) and activate p-PKC-MAPK/Rock1 pathways to repress Sox9b  
270 activities.

271

## 272 Discussion

273 Inducing cell phenotypic conversions usually require multi-purpose signaling inputs and major remodeling of  
274 gene transcription (Zhang, Stokes et al., 2011). Specific miRNAs and targets have been identified to account  
275 for cell identity changes of skin stem cells (Zhang et al., 2011), mesenchymal progenitors (Huang, Zhao et al.,  
276 2010), and cardiomyocytes (Xin, Olson et al., 2013). Functionally phenotypic conversion of sex gonadal cells  
277 appear more intriguing, because it involves coordination of multiple somatic and germline lineages in order to  
278 successfully commit testiculogenesis or folliculogenesis. As scientists are trying to translate the information  
279 gained from basic scientific studies on ovarian organogenesis to the development of *in vitro* strategies to  
280 derive stem-cell based ‘prosthetic ovary’ (Truman, Tilly et al., 2017), an attractive possible alternative step in  
281 this process is discovery of new ways to drive oogenesis *in vivo*. In the present study, we find that specific  
282 miRNAs- GPCR networks could modulate and renew spermatogenesis and folliculogenesis.

283 First, we provide molecular basis for miRNAs-posttranscriptional regulation of Sox9 switch in the gonadal  
284 sex differentiation. In mammals, sex differentiation is controlled by two groups of sex-determining genes that  
285 promote one gonadal sex and antagonize the opposite one (Rodriguez-Mari et al., 2005). Zebrafish has no sex  
286 chromosome but has two isoforms of *sox9* gene: *sox9a* and *sox9b* (Chiang et al., 2001). Our *in vitro* cell

287 transfections and in vivo gonadal microinjections indicated that miR430a-Sox9a network could induce  
288 spermatogenesis while miR218a-Sox9b network promote folliculogenesis. We established  
289 miR430a/miR218a-GPCR-Sox9a/Sox9b switch regulatory model. In this model, miR430a and miR218a  
290 convergently target *lgr4*, *grk5l* and *grk4* GPCR genes, and conditionally regulate PI3K/ PKC/Rock signaling  
291 pathways and Sox9a/Sox9b activities in two sex gonads. MicroRNA-340 inhibits invasion and metastasis of  
292 cancer cells by downregulating ROCK1 in (Maskey, Li et al., 2017), however miR430a and Sox9a mixture  
293 coordinately activate Rock1 and PKC pathways to induce spermatogenesis. In the ovary Sox9b and miR218a  
294 together could restrain PI3K/ PKC/Rock signaling to increase primordial follicle reserve. This repression is  
295 important because over-activation of PI3K/ mTORC1 signaling pathways could accelerate depletion of  
296 primordial follicles, and lead to premature activation of the entire pool of primordial follicles (Adhikari,  
297 Zheng et al., 2010, Reddy, Liu et al., 2008).

298 GPCRs (G protein-coupled receptors) were found to play crucial roles in maintenance of planarian germ cell  
299 plasticity (Saber, Jamal et al., 2016). We identified three putative GPCR molecules and several modifier  
300 enzymes responsible for Sox9a and Sox9b posttranscriptional modifications (Table 3). Given that *Lgr4*, *Grk5l*  
301 and *Grk4* could respectively link to gonadotropins(Hsu, Liang et al., 1998), mTORC1 activity (Burkhalter,  
302 Fralish et al., 2013), as well as SUMO modification (Yu, Yin et al., 2017), our finding not only supplements  
303 the previously described composition and function of G protein-coupled receptor signalsomes (Bar Oz, Kumar  
304 et al., 2016, Luttrell, 2005, Spiegelberg, 2013), but also clarifies the signal transduction of gonadotropins  
305 /GPCR/MAPK/ Sox9a/b switch pathways.

306 Second, our analysis on the global mRNA-miRNA expression profiles that concur in the same sex gonads  
307 represents the first effort to systematically identify the gonadotropins-GPCR-Sox9 regulatory networks in  
308 testiculogenesis and folliculogenesis. We extend the previous finding that miRNAs could target multiple  
309 genes and form a complex miRNA regulatory network (Tao et al., 2016), and summarize four interaction  
310 modes between specific miRNAs and the target genes, *i.e.*, downregulatory target-pair, upregulatory target-pair,  
311 conditionally regulatory target-pair, and indirectly regulatory target-pair.

312 Previous studies have revealed dual regulatory module of miRNAs from repression to activation at  
313 transcriptional and translational levels (Vasudevan, Tong et al., 2007). The miR-430 allows the  
314 post-transcriptional activation of *nanos1* in germline cells, but induces deadenylation and translational



315 repression in somatic cells (Mishima, Giraldez et al., 2006). Now we present the other mechanism that  
316 miR430a could modulate expression and intercellular localization of Sox9a and Sox9b proteins through  
317 chemical modifications, such as phosphorylation, acetylation, oxidation and ubiquitination (Table 3). It has  
318 been found that these types of posttranscriptional modifications could modulate the stability, intracellular  
319 localization, and the overall activity of Sox9 (Bar Oz et al., 2016, Jo et al., 2014, Xu, Paige et al., 2010).  
320 Finally, we initiated gonadal injections of the specific miRNA-target cocktail to rejuvenate gonadal reserve.  
321 Replacement therapy with hormones, and stem cells, blood from aged male, and blood mononuclear cells  
322 have been tested to promote ovarian follicle dynamics, spermatogenesis, and tissue rejuvenation (Bukovsky,  
323 2015, Moss, Crosnoe et al., 2013, Niikura, Niikura et al., 2010, Tilly & Telfer, 2009, Zouboulis &  
324 Makrantonaki, 2012). However our knowledge of how these factors and cells repair aged reproductive  
325 functions still remains limited. Although adult mouse ovaries retain proliferative germ cells resembling male  
326 spermatogonial stem cells *in vitro* (Tilly & Telfer, 2009), it is desirable to induce oogenesis under physiological  
327 conditions. In the present study, we found that gonadal injection of miR430a-Sox9a mixture could increase  
328 testicular gonocytes, and miR218a-Sox9b mixture could increase primordial follicles in old ovaries. Although  
329 it is unknown about the source origins from proliferation of reserved stem cell or dedifferentiation of adult  
330 gonadal cells, miR430a-Sox9a and miR430a-Sox9b at least could expand the testis spermatogonia reserve and  
331 ovarian follicle reserve respectively. If equivalent efficacy can be found in human gonads, miRNA-based  
332 testis rejuvenation and prevention of premature ovarian failure may one day be realized. The miRNA-target  
333 pair data reported here will help identify more potential therapeutic targets and promote to develop new  
334 therapeutic interventions for aging-related ovarian failure and age-related testicular regression.

335

## 336 **Materials and methods**

### 337 **Fish husbandry**

338 Zebrafish and *vasa*-GFP transgenic medaka were bred and maintained as previously described (Li, Guan et al.,  
339 2013, Wang, He et al., 2012, Yuan et al., 2014) . All experiments with zebrafish and medaka were approved  
340 by the laboratory animal care and use committee of Shanghai Ocean University, and performed in  
341 accordance with “Guide for the Care and Use of Laboratory Animals” (NIH).

### 342 **Gonadal microinjection**

343 A simple and feasible method for body surface injection into sex gonad has been described (personal data).  
344 Briefly, we dissected ten adult zebrafish (five each sex), measured the size ratio of gonad to the body, and  
345 figured out the integrated surface projection of the sex gonads, and determined the injection area. Based on the  
346 relative size and location of the sex gonads, injection site was about 1 mm upward from the intersect between  
347 pectoral fin upper horizontal and the front end vertical line of pelvic fin. By this way overexpression  
348 plasmids (100ng), and/or specific miRNAs (20pmol each oligos) (Table S10) were microinjected into sex  
349 gonads with lipohigh transfection reagent (Sangon Biotech, Shanghai). Microinjection efficiency was  
350 confirmed by western blotting analyses of enforced Sox9a-Myc and Sox9b-Myc (Fig.S6).

351 **Data Availability Statement:** All relevant data are within the paper and its supporting information files. All  
352 RNA sequencing data are available at the NCBI short read archive: under study number PRJNA293388  
353 (SRP062685) for mRNA transcriptome; under study number PRJNA294493 (SRP063086) for small RNA.

354

### 355 **Acknowledgements**

356 We thank Ying Peng for her technical assistance in immunoblotting analyses. This work was supported in part  
357 by Shanghai Universities First-class Disciplines Project of Fisheries to JY, and National Natural Science  
358 Foundation of China (31672700) to ML. The funders had no role in study design, data collection and analysis,  
359 decision to publish, or preparation of the manuscript.

360

### 361 **Author contributions**

362 Conceived and designed the experiments: JY. Performed the experiments: XD, HG, YZ, JW. Analyzed the data: JY, XH,  
363 XD, HG, YZ, JW. Wrote the paper: JY, XH, ML.

364

365 **Competing Interests:** The authors have declared that no competing interests exist.

366

### 367 **References**

368 Adhikari D, Zheng W, Shen Y, Gorre N, Hamalainen T, Cooney AJ, Huhtaniemi I, Lan ZJ, Liu K (2010) Tsc/mTORC1 signaling  
369 in oocytes governs the quiescence and activation of primordial follicles. *Hum Mol Genet* 19: 397-410  
370 Bar Oz M, Kumar A, Elayyan J, Reich E, Binyamin M, Kandel L, Liebergall M, Steinmeyer J, Lefebvre V, Dvir-Ginzberg M  
371 (2016) Acetylation reduces SOX9 nuclear entry and ACAN gene transactivation in human chondrocytes. *Aging Cell* 15:

372 499-508  
373 Bukovsky A (2015) Novel methods of treating ovarian infertility in older and POF women, testicular infertility, and other  
374 human functional diseases. *Reprod Biol Endocrinol* 13: 10  
375 Burkhalter MD, Fralish GB, Premont RT, Caron MG, Philipp M (2013) Grk5l controls heart development by limiting mTOR  
376 signaling during symmetry breaking. *Cell Rep* 4: 625-32  
377 Chen SR, Zheng QS, Zhang Y, Gao F, Liu YX (2013) Disruption of genital ridge development causes aberrant primordial  
378 germ cell proliferation but does not affect their directional migration. *BMC Biol* 11: 22  
379 Chiang EF, Pai CI, Wyatt M, Yan YL, Postlethwait J, Chung B (2001) Two sox9 genes on duplicated zebrafish chromosomes:  
380 expression of similar transcription activators in distinct sites. *Dev Biol* 231: 149-63  
381 Galliot B, Ghila L (2010) Cell plasticity in homeostasis and regeneration. *Mol Reprod Dev* 77: 837-55  
382 Gao Y, Guo W, Hu Q, Zou M, Tang R, Chi W, Li D (2014) Characterization and differential expression patterns of conserved  
383 microRNAs and mRNAs in three genders of the rice field eel (*Monopterus albus*). *Sex Dev* 8: 387-98  
384 Gassei K, Schlatt S (2007) Testicular morphogenesis: comparison of in vivo and in vitro models to study male gonadal  
385 development. *Ann N Y Acad Sci* 1120: 152-67  
386 Hsu SY, Liang SG, Hsueh AJ (1998) Characterization of two LGR genes homologous to gonadotropin and thyrotropin  
387 receptors with extracellular leucine-rich repeats and a G protein-coupled, seven-transmembrane region. *Mol Endocrinol*  
388 12: 1830-45  
389 Huang J, Zhao L, Xing L, Chen D (2010) MicroRNA-204 regulates Runx2 protein expression and mesenchymal progenitor  
390 cell differentiation. *Stem Cells* 28: 357-64  
391 Jo A, Denduluri S, Zhang B, Wang Z, Yin L, Yan Z, Kang R, Shi LL, Mok J, Lee MJ, Haydon RC (2014) The versatile functions  
392 of Sox9 in development, stem cells, and human diseases. *Genes Dis* 1: 149-161  
393 Kang L, Cui X, Zhang Y, Yang C, Jiang Y (2013) Identification of miRNAs associated with sexual maturity in chicken ovary  
394 by Illumina small RNA deep sequencing. *BMC Genomics* 14: 352  
395 Kobayashi A, Chang H, Chaboissier MC, Schedl A, Behringer RR (2005) Sox9 in testis determination. *Ann N Y Acad Sci*  
396 1061: 9-17  
397 Li M, Guan G, Hong N, Hong Y (2013) Multiple regulatory regions control the transcription of medaka germ gene vasa.  
398 *Biochimie* 95: 850-7  
399 Luttrell LM (2005) Composition and function of g protein-coupled receptor signalsomes controlling mitogen-activated  
400 protein kinase activity. *J Mol Neurosci* 26: 253-64  
401 Maskey N, Li D, Xu H, Song H, Wu C, Hua K, Song J, Fang L (2017) MicroRNA-340 inhibits invasion and metastasis by  
402 downregulating ROCK1 in breast cancer cells. *Oncol Lett* 14: 2261-2267  
403 McClelland K, Bowles J, Koopman P (2012) Male sex determination: insights into molecular mechanisms. *Asian J Androl*  
404 14: 164-71  
405 Mishima Y, Giraldez AJ, Takeda Y, Fujiwara T, Sakamoto H, Schier AF, Inoue K (2006) Differential regulation of germline  
406 mRNAs in soma and germ cells by zebrafish miR-430. *Curr Biol* 16: 2135-42  
407 Moss JL, Crosnoe LE, Kim ED (2013) Effect of rejuvenation hormones on spermatogenesis. *Fertil Steril* 99: 1814-20  
408 Murakami S, Kan M, McKeenan WL, de Crombrughe B (2000) Up-regulation of the chondrogenic Sox9 gene by  
409 fibroblast growth factors is mediated by the mitogen-activated protein kinase pathway. *Proc Natl Acad Sci U S A* 97:  
410 1113-8  
411 Niikura Y, Niikura T, Wang N, Satirapod C, Tilly JL (2010) Systemic signals in aged males exert potent rejuvenating effects  
412 on the ovarian follicle reserve in mammalian females. *Aging (Albany NY)* 2: 999-1003  
413 Real FM, Sekido R, Lupianez DG, Lovell-Badge R, Jimenez R, Burgos M (2013) A microRNA (mmu-miR-124) prevents Sox9  
414 expression in developing mouse ovarian cells. *Biol Reprod* 89: 78  
415 Reddy P, Liu L, Adhikari D, Jagarlamudi K, Rajareddy S, Shen Y, Du C, Tang W, Hamalainen T, Peng SL, Lan ZJ, Cooney AJ,

- 416 Huhtaniemi I, Liu K (2008) Oocyte-specific deletion of Pten causes premature activation of the primordial follicle pool.  
417 *Science* 319: 611-3
- 418 Rodriguez-Mari A, Yan YL, Bremiller RA, Wilson C, Canestro C, Postlethwait JH (2005) Characterization and expression  
419 pattern of zebrafish Anti-Mullerian hormone (Amh) relative to sox9a, sox9b, and cyp19a1a, during gonad development.  
420 *Gene Expr Patterns* 5: 655-67
- 421 Rosa A, Spagnoli FM, Brivanlou AH (2009) The miR-430/427/302 family controls mesendodermal fate specification via  
422 species-specific target selection. *Dev Cell* 16: 517-27
- 423 Saberi A, Jamal A, Beets I, Schoofs L, Newmark PA (2016) GPCRs Direct Germline Development and Somatic Gonad  
424 Function in Planarians. *PLoS Biol* 14: e1002457
- 425 Selbach M, Schwanhausser B, Thierfelder N, Fang Z, Khanin R, Rajewsky N (2008) Widespread changes in protein  
426 synthesis induced by microRNAs. *Nature* 455: 58-63
- 427 Spiegelberg BD (2013) G protein coupled-receptor signaling and reversible lysine acetylation. *J Recept Signal Transduct*  
428 *Res* 33: 261-6
- 429 Sun D, Zhang Y, Wang C, Hua X, Zhang XA, Yan J (2013) Sox9-related signaling controls zebrafish juvenile ovary-testis  
430 transformation. *Cell Death Dis* 4: e930
- 431 Taieb J, Grynberg M, Pierre A, Arouche N, Massart P, Belville C, Hesters L, Frydman R, Catteau-Jonard S, Fanchin R, Picard  
432 JY, Josso N, Rey RA, di Clemente N (2011) FSH and its second messenger cAMP stimulate the transcription of human  
433 anti-Mullerian hormone in cultured granulosa cells. *Mol Endocrinol* 25: 645-55
- 434 Tanaka M, Kinoshita M, Kobayashi D, Nagahama Y (2001) Establishment of medaka (*Oryzias latipes*) transgenic lines with  
435 the expression of green fluorescent protein fluorescence exclusively in germ cells: a useful model to monitor germ cells  
436 in a live vertebrate. *Proc Natl Acad Sci U S A* 98: 2544-9
- 437 Tao W, Sun L, Shi H, Cheng Y, Jiang D, Fu B, Conte MA, Gammerdinger WJ, Kocher TD, Wang D (2016) Integrated analysis  
438 of miRNA and mRNA expression profiles in tilapia gonads at an early stage of sex differentiation. *BMC Genomics* 17: 328
- 439 Tilly JL, Telfer EE (2009) Purification of germline stem cells from adult mammalian ovaries: a step closer towards control  
440 of the female biological clock? *Mol Hum Reprod* 15: 393-8
- 441 Truman AM, Tilly JL, Woods DC (2017) Ovarian regeneration: The potential for stem cell contribution in the postnatal  
442 ovary to sustained endocrine function. *Mol Cell Endocrinol* 445: 74-84
- 443 Vasudevan S, Tong Y, Steitz JA (2007) Switching from repression to activation: microRNAs can up-regulate translation.  
444 *Science* 318: 1931-4
- 445 Wang X, He H, Tang W, Zhang XA, Hua X, Yan J (2012) Two origins of blastemal progenitors define blastemal regeneration  
446 of zebrafish lower jaw. *PLoS One* 7: e45380
- 447 Wilhelm D, Palmer S, Koopman P (2007) Sex determination and gonadal development in mammals. *Physiol Rev* 87: 1-28
- 448 Xiao J, Zhong H, Zhou Y, Yu F, Gao Y, Luo Y, Tang Z, Guo Z, Guo E, Gan X, Zhang M, Zhang Y (2014) Identification and  
449 characterization of microRNAs in ovary and testis of Nile tilapia (*Oreochromis niloticus*) by using solexa sequencing  
450 technology. *PLoS One* 9: e86821
- 451 Xin M, Olson EN, Bassel-Duby R (2013) Mending broken hearts: cardiac development as a basis for adult heart  
452 regeneration and repair. *Nat Rev Mol Cell Biol* 14: 529-41
- 453 Xu G, Paige JS, Jaffrey SR (2010) Global analysis of lysine ubiquitination by ubiquitin remnant immunoaffinity profiling.  
454 *Nat Biotechnol* 28: 868-73
- 455 Yan YL, Willoughby J, Liu D, Crump JG, Wilson C, Miller CT, Singer A, Kimmel C, Westerfield M, Postlethwait JH (2005) A  
456 pair of Sox: distinct and overlapping functions of zebrafish sox9 co-orthologs in craniofacial and pectoral fin  
457 development. *Development* 132: 1069-83
- 458 Yu CQ, Yin LQ, Tu ZT, Liu DW, Luo WP (2017) The regulatory role of dopamine receptor D1 on PP2A via SUMO-1  
459 modification. *Eur Rev Med Pharmacol Sci* 21: 3270-3276

- 460 Yuan Y, Li M, Hong Y (2014) Light and electron microscopic analyses of Vasa expression in adult germ cells of the fish  
461 medaka. *Gene* 545: 15-22
- 462 Zhang L, Stokes N, Polak L, Fuchs E (2011) Specific microRNAs are preferentially expressed by skin stem cells to balance  
463 self-renewal and early lineage commitment. *Cell Stem Cell* 8: 294-308
- 464 Zouboulis CC, Makrantonaki E (2012) Hormonal therapy of intrinsic aging. *Rejuvenation Res* 15: 302-12  
465
- 466
